1 **Temperature increases soil respiration across ecosystem types and soil development,**  
2 **but soil properties determine the magnitude of this effect**

3

4 **Running head:** Temperature effect on soil respiration

5

6 Marina Dacal<sup>1,2\*</sup>, Manuel Delgado-Baquerizo<sup>3</sup>, Jesús Barquero<sup>3</sup>, Asmeret Asefaw Berhe<sup>4</sup>,

7 Antonio Gallardo<sup>3</sup>, Fernando T. Maestre<sup>2,5</sup> & Pablo García-Palacios<sup>6</sup>

8

9 <sup>1</sup>Departamento de Biología y Geología, Física y Química Inorgánica, Universidad Rey

10 Juan Carlos, C/ Tulipán s/n, 28933 Móstoles, Spain

11 <sup>2</sup>Instituto Multidisciplinar para el Estudio del Medio “Ramon Margalef”, Universidad de

12 Alicante, Carretera de San Vicente del Raspeig s/n, 03690 San Vicente del Raspeig, Spain

13 <sup>3</sup>Departamento de Sistemas Físicos, Químicos y Naturales, Universidad Pablo Olavide,

14 41704 Sevilla, Spain.

15 <sup>4</sup>Department of Life and Environmental Sciences; University of California, Merced CA

16 95343, USA

17 <sup>5</sup>Departamento de Ecología, Universidad de Alicante, Carretera de San Vicente del

18 Raspeig s/n, 03690 San Vicente del Raspeig, Spain

19 <sup>6</sup>Instituto de Ciencias Agrarias, Consejo Superior de Investigaciones Científicas, Serrano

20 115 bis, 28006, Madrid, Spain.

21

22

23 \* Correspondence e-mail: [marina.dacal1@gmail.com](mailto:marina.dacal1@gmail.com)

24

25

26 **Abstract**

27 Soil carbon losses to the atmosphere, via soil heterotrophic respiration, are expected to  
28 increase in response to global warming, resulting in a positive carbon-climate feedback.  
29 Despite the well-known suite of abiotic and biotic factors controlling soil respiration,  
30 much less is known about how the magnitude of soil respiration responses to temperature  
31 changes over soil development and across contrasting soil properties. Here, we  
32 investigated the role of soil development stage and soil properties in driving the responses  
33 of soil heterotrophic respiration to increasing temperatures. We incubated soils from eight  
34 chronosequences ranging in soil age from hundreds to million years, and encompassing  
35 a wide range of vegetation types, climatic conditions, and chronosequences origins, at  
36 three assay temperatures (5, 15 and 25°C). We found a consistent positive effect of assay  
37 temperature on soil respiration rates across the eight chronosequences evaluated.  
38 However, soil properties such as organic carbon concentration, texture, pH, phosphorus  
39 content, and microbial biomass determined the magnitude of temperature effects on soil  
40 respiration. Finally, we observed a positive effect of soil development stage on soil  
41 respiration that did not alter the magnitude of assay temperature effects. Our work reveals  
42 that key soil properties alter the magnitude of the positive effect of temperature on soil  
43 respiration found across ecosystem types and soil development stages. This information  
44 is essential to better understand the magnitude of the carbon-climate feedback, and thus  
45 to establish accurate greenhouse gas emission targets.

46

47 **Keywords:** climate warming, land carbon-climate feedback, microbial biomass, nutrient  
48 availability, soil chronosequences, soil texture.

49

## 50 **Introduction**

51

52 Temperature is a key driver of heterotrophic soil respiration (hereafter soil respiration),  
53 –a major process of carbon (C) loss to the atmosphere (Bond-Lamberty, Bailey, Chen,  
54 Gough, & Vargas, 2018; Bond-Lamberty & Thomson, 2010; Zhou et al., 2016). Global  
55 warming is expected to accelerate the rate of soil respiration (Davidson & Janssens, 2006;  
56 Kirschbaum, 2006), reinforcing climate change with a land C-climate feedback  
57 embedded in the Intergovernmental Panel on Climate Change (IPCC) projections (Ciais  
58 et al., 2014). Despite the recognized importance of an accurate representation of this  
59 feedback in Earth System Models to establish appropriate greenhouse gas emission  
60 targets (Bradford et al., 2016), the extent to which climate change will increase soil C  
61 losses to the atmosphere via soil respiration is still highly uncertain (Arora et al., 2013;  
62 Exbrayat, Pitman, & Abramowitz, 2014). Learning more about how and why soil  
63 properties regulate the magnitude of soil respiration responses to elevated temperatures  
64 is essential to accurately predict the land C-climate feedback in a warmer world.

65 To build confidence in the projected magnitude of the land C-climate feedback,  
66 the response of soil respiration to climate warming should be addressed across large  
67 spatial scales and encompassing a wide range of soil development stages. Beyond  
68 temperature, it is also critical to determine the influence of other key abiotic and biotic  
69 factors that regulate soil respiration (Guo et al., 2017; Rustad, Huntington, & Boone,  
70 2000; Schindlbacher, Schnecker, Takriti, Borken, & Wanek, 2015). These include key  
71 soil abiotic drivers such as organic carbon (SOC), texture (i.e., the percentage of sand,  
72 silt, and clay), pH, and phosphorus (P), as well as biotic properties such as microbial  
73 biomass (Bradford, Watts, & Davies, 2010; Karhu et al., 2014). For instance, soil texture  
74 influences soil respiration by controlling water and nutrient availability (Delgado-

75 Baquerizo et al., 2013) and regulating the potential of soil minerals to physically and  
76 chemically stabilize organic carbon (Rasmussen et al., 2018). A previous study showed  
77 that soils with higher proportion of clay sized particles also had higher microbial activity  
78 due to greater water and nutrient availability, leading to higher soil respiration (Karhu et  
79 al., 2014). Further, soil respiration increases as microbial biomass rises (Wang, Dalal,  
80 Moody, & Smith, 2003). Despite the knowledge accumulated about soil respiration  
81 drivers, much less is known about how soil properties modulate soil respiration responses  
82 to warming.

83 Soils are known to develop from centuries to millennia, resulting in important  
84 changes in key abiotic properties (Crews et al., 1995; Vitousek, 2004; Wardle, Bardgett,  
85 et al., 2004). For example, young soils are known to accumulate organic carbon during  
86 soil development from centuries to millennia (Schlesinger, 1990), and older soils are  
87 expected to support more acid, and P depleted soils compared with younger substrates  
88 (Doetterl et al., 2018; Laliberté et al., 2013). Importantly, although soil properties do  
89 change as soil develops over geological timescales, the parent material does not vary.  
90 Because of this, soil development has been suggested as a good model system to  
91 investigate the role of soil abiotic and biotic properties in driving the responses of soil  
92 respiration to disturbances such as increasing temperatures (Orwin et al., 2006). A  
93 number of studies performed at individual soil chronosequences have investigated  
94 whether soil development stage influences soil respiration rates, showing contrasting  
95 results. Whereas some studies found an enhancing effect of soil development on soil  
96 respiration (J. L. Campbell & Law, 2005; Law, Sun, Campbell, Van Tuyl, & Thornton,  
97 2003), others observed that soil respiration rates decreased as soil develops (Tang et al.,  
98 2008; Wang, Bond-Lamberty, & Gower, 2002). These differences are likely due to site-  
99 specific variations in soil development trajectories between chronosequences with

100 contrasting parent material and climatic conditions (Alfaro, Manzano, Marquet, &  
101 Gaxiola, 2017). Therefore, to gain a more comprehensive understanding of how soil  
102 development affects soil respiration and its response to temperature, such effects should  
103 be evaluated both within single chronosequences but also across multiple  
104 chronosequences occurring in different ecosystem types with contrasting environmental  
105 conditions (e.g. climate, parent material, soil origin, etc.).

106 Beyond soil properties and soil development, other mechanisms may also  
107 modulate soil respiration responses to temperature. For instance, substrate depletion and  
108 thermal acclimation have been demonstrated to alter soil respiration responses to  
109 temperature (Bradford et al., 2010; Hartley, Hopkins, Garnett, Sommerkorn, & Wookey,  
110 2008). Temperature accelerates microbial activity, leading to an increase in soil  
111 respiration (Hochachka & Somero, 2002). However, microorganisms develop several  
112 mechanisms to acclimate to the ambient temperature regime such as changes in enzyme  
113 and membrane structures. Hence, when subjected to the same temperature range, the  
114 microbial activity and soil respiration of acclimated microorganisms would be lower  
115 compared to the not acclimated ones (Hochachka & Somero, 2002). Therefore, thermal  
116 acclimation to the ambient temperature regime may help to reduce the magnitude of soil  
117 respiration responses to temperature (Bradford et al., 2019; Dacal, Bradford, Plaza,  
118 Maestre, & García-Palacios, 2019). At the same time, such acceleration in microbial  
119 activity with temperature may also cause an important reduction in the availability of  
120 readily decomposable C sources, leading to substrate depletion (Cavicchioli et al., 2019;  
121 Schindlbacher et al., 2015). Consequently, substrate depletion can limit microbial  
122 processes such as soil respiration (Walker et al., 2018). Given that such mechanisms may  
123 mitigate soil respiration responses to temperature, they should also be evaluated to  
124 improve the accuracy in the predictions of the land C-climate feedbacks.

125           Herein, we used soil development as an ecological model system to test the  
126 importance of soil properties in driving the responses of soil respiration to changes in  
127 temperature. To such an end, we take advantage of soils collected from eight  
128 chronosequences (Delgado-Baquerizo et al., 2019, 2020) located in Arizona (AZ; USA),  
129 California (CAL; USA), Colorado (CO; USA), Hawaii (HA; USA), New Mexico (JOR;  
130 USA), Chile (CH), Spain (CI) and Australia (WA) to perform an independent laboratory  
131 assay based on short-term soil incubations at three assay temperatures (5, 15 and 25°C).  
132 These chronosequences range from hundreds to million years and encompass a wide  
133 range of vegetation types (i.e., grasslands, shrublands, and forests), climatic conditions  
134 (arid, continental, temperate and tropical), and origins (i.e., sand dunes, sedimentary and  
135 volcanic; see Table 1 for more details). Further, we addressed whether soil respiration  
136 and its response to temperature change over soil development either within or across  
137 chronosequences. Finally, we assessed whether thermal acclimation influences soil  
138 respiration responses to temperature across contrasting ecosystem types and soil  
139 development stages.

140

## 141 **Materials and methods**

### 142 *Study design and field soil collection*

143 The environmental conditions of the eight chronosequences used spanned a wide gradient  
144 in climatic conditions (MAT from 8.7 to 19.55°C, and MAP from 276 to 1907 mm) and  
145 soil properties (SOC from 0.6 to 25.3 and the percentage of clay plus silt from 3.8 to 44.1,  
146 Table 1). The selected chronosequences included four to six stages of soil development.  
147 Stage number one corresponds to the youngest soil, whereas four, five, or six correspond  
148 to the oldest one within each chronosequence. Each chronosequence was considered a  
149 site, so the total number of sites and stages surveyed in our study is 8 and 41, respectively.

150 At each stage, we established a 50 m x 50 m plot for conducting field surveys. Three  
151 parallel transects of 50 m length, spaced 25 m apart, formed the basis of the plot. The  
152 total plant cover and the number of perennial plant species (plant diversity) were  
153 determined in each transect using the line-intercept method (Delgado-Baquerizo et al.,  
154 2019). All of the sites were surveyed between 2016 and 2017 using a standardized  
155 sampling protocol (Delgado-Baquerizo et al., 2019). At each plot, three composite soil  
156 samples (five soil cores per sample: 0 – 10 cm depth) were collected under the canopy of  
157 the dominant ecosystem vegetation type (e.g., grasses, shrubs, and trees). Soil samples  
158 were collected during the same days within each soil chronosequence. After field  
159 collection, soils were sieved at 2 mm, and a fraction was immediately frozen at -20°C for  
160 soil microbial biomass analyses. The rest of the soil was air-dried for a month and used  
161 for biochemical analyses and laboratory incubations.

162

### 163 *Soil abiotic properties*

164 We measured the following abiotic soil properties in all samples: soil organic C (SOC),  
165 texture (% of clay + silt), pH, and available soil phosphorus (soil P). To avoid  
166 confounding effects associated with having multiple laboratories performing soil  
167 analyses, all dried soil samples were shipped to Spain (Universidad Rey Juan Carlos) for  
168 laboratory analyses. The concentration of SOC was determined by colorimetry after  
169 oxidation with a mixture of potassium dichromate and sulfuric acid at 150° C for 30  
170 minutes (Anderson & Ingram, 1993). Soil pH was measured with a pH meter in a 1:2.5  
171 suspensions of dry soil mass to deionized water volume. Soil texture (% clay + silt) was  
172 determined on a composite sample per chronosequence stage, according to Kettler,  
173 Doran, & Gilbert (2001). Olsen P (soil P hereafter) was determined by extraction with  
174 sodium bicarbonate, according to Olsen, Cole, Watanabe, & Dean (1954). Mean annual

175 temperature (MAT) and mean annual precipitation (MAP) values for the soils of each site  
176 were obtained using Wordclim version 2.0 (Fick & Hijmans, 2017), which provides  
177 global average climatic data for the 1970-2000 period.

178

#### 179 *Soil microbial biomass*

180 We estimated soil microbial biomass by measuring phospholipid fatty acids (PLFAs).  
181 These were extracted from freeze-dried soil samples using the method described in Bligh  
182 & Dyer (1959), as modified by Buyer & Sasser (2012). The extracted PLFAs were  
183 analysed on an Agilent Technologies 7890B gas chromatograph with an Agilent DB-5  
184 ms column (Agilent Technologies, CA, USA). The biomarkers selected to indicate total  
185 bacterial biomass are the PLFAs i15:0, a15:0, 15:0, i16:0, 16:1 $\omega$ 7, 17:0, i17:0, a17:0,  
186 cy17:0, 18:1 $\omega$ 7 and cy19:0, and the biomarker to indicate total fungal biomass is the  
187 PLFA 18:2 $\omega$ 6. Using the selected PLFA biomarkers, the biomass was calculated for each  
188 soil sample (Frostegård & Bååth, 1996; Rinnan & Bååth, 2009). Total microbial biomass  
189 includes the sum of all bacterial and fungal biomarkers plus that of other soil microbial  
190 biomarkers such as the eukaryotic C18:1 $\omega$ 9.

191

#### 192 *Laboratory incubations and soil heterotrophic respiration measurements*

193 We conducted short-term (10 h) incubations of our soil samples, in accordance with  
194 previous studies (Atkin & Tjoelker, 2003; Bradford et al., 2010; Hochachka & Somero,  
195 2002; Tucker, Bell, Pendall, & Ogle, 2013), at 5, 15, and 25°C at 60% of WHC. The short  
196 timescale used was chosen to prevent acclimation to the assay temperatures used in the  
197 laboratory. The incubation temperatures (5, 15 y 25°C) were selected to cover the range  
198 spanned by the MAT values of the eight chronosequences studied (from 8.7 to 19.55°C).  
199 Additionally, such incubation temperatures are similar to the ones used in previous



200 studies (Bradford et al., 2008, 2019; Dacal et al., 2019). Soil samples were incubated in  
201 96-deepwell microplates (1.3 mL wells) by adding *c.* 0.5 g soil per well. All soil samples  
202 were run in triplicate (laboratory replicates). Incubations were performed in growth  
203 chambers under dark conditions and 100% air humidity. Microplates were covered with  
204 polyethylene film to prevent soil drying but to allow gas exchange.

205       Soil respiration rates were measured using a modified MicroResp<sup>TM</sup> technique (C.  
206 D. Campbell, Chapman, Cameron, Davidson, & Potts, 2003). Glucose at a dose of 10 mg  
207 C g<sup>-1</sup> dry soil was used as a substrate. It was used to avoid substrate limitation on soil  
208 respiration rates (Bradford et al., 2010), as the dose used in our study is supposed to  
209 exceed microbial demand (Davidson, Janssens, & Luo, 2006). Soils were incubated at the  
210 particular assay temperature (5, 15, and 25°C) for ten hours. However, the detection plates  
211 used to measure soil respiration were only incubated during the last 5 hours to avoid the  
212 oversaturation of the detection solution. The absorbance of the detection plate was read  
213 immediately before and after its use. Three analytical replicates were run per sample, and  
214 the mean of these repeats per assay temperature was used as the observation of potential  
215 respiration rate for each sample.

216

### 217 *Statistical analyses*

218       We evaluated the importance of soil properties in driving the responses of soil  
219 respiration to changes in temperature. To do that, we firstly analysed soil respiration  
220 responses to assay temperature within and across chronosequences. For within  
221 chronosequences analyses, we built eight linear regression models (LM) including soil  
222 development stage, assay temperature, the interaction between both variables, SOC,  
223 texture, pH, soil P, and microbial biomass as fixed factors. Soil properties were removed  
224 until there is a low collinearity between them and soil development stage (i.e. square-root

225 VIFs <2, Bradford et al., 2017). However, to evaluate the assay temperature effect on soil  
226 respiration across chronosequences, we performed a linear mixed-effects model (LMM)  
227 with soil development stage (in years), MAT, assay temperature, SOC, texture, pH, soil  
228 P, and microbial biomass as fixed factors, and the chronosequence identity as a random  
229 factor. We then compared whether there were differences in the magnitude of the effect  
230 of assay temperature on soil respiration among chronosequences, using the standardized  
231 coefficients of assay temperature obtained in the within chronosequence LMs. Finally,  
232 we tested whether biotic and abiotic factors drive the response of soil respiration to  
233 temperature. For doing so, we built LMMs that incorporated soil development stage (in  
234 years) and assay temperature as fixed factors, and chronosequence identity as a random  
235 factor using different subsets of data. Specifically, we grouped the chronosequences in  
236 two levels according to each of the environmental conditions and soil properties  
237 considered such as the origin of the chronosequence, MAT, SOC, texture, pH, P, and  
238 microbial biomass. Then, we ran the model described above separately for each group of  
239 data to evaluate how the magnitude of the effect of temperature on soil respiration  
240 changes between the models using groups of data with contrasting environmental  
241 conditions and soil properties. In most cases, each of the groups of data included four  
242 chronosequences each (i.e., half of the chronosequences studied each). We classified each  
243 chronosequence by the mean across the whole chronosequence of each of the selected  
244 variables to avoid separating different stages of the same chronosequence in different  
245 groups. The threshold to distinguish between both groups of each category was  
246 established at the value closest to the mean among all observations that allow having the  
247 same or almost the same number of chronosequences in each group.

248         On the other hand, to evaluate the effect of soil development on soil respiration  
249 and its response to temperature we used the same approach described above for evaluating

250 the effect of assay temperature on soil respiration (LMs within chronosequences and an  
251 LMM across chronosequences). Additionally, we used two different approximations for  
252 soil development stage depending on the spatial scale. When analysing each  
253 chronosequence separately, we used the stage (from 1 to 6) to address the effects of soil  
254 development stage (Delgado-Baquerizo et al., 2019; Laliberté et al., 2013; Wardle,  
255 Bardgett, Walker, & Bonner, 2009; Wardle, Walker, & Bardgett, 2004), given the high  
256 level of uncertainty in assigning precise ages for many of the chronosequences studied  
257 (Wardle, Walker, et al., 2004). However, when analysing across chronosequences, we  
258 used the estimation of years as a measure of soil development stage (Crews et al., 1995;  
259 Tarlera, Jangid, Ivester, Whitman, & Williams, 2008) to compare chronosequences  
260 covering contrasting ranges of soil development stages.

261 Finally, to test whether the thermal acclimation of soil respiration to the ambient  
262 temperature regime influences the soil respiration responses to assay temperature over  
263 soil development, we performed an LMM as that described above. We statistically  
264 controlled for differences in soil microbial biomass by including it as a covariate in the  
265 model (Bradford et al., 2019, 2010; Dacal et al., 2019). All the statistical analyses were  
266 conducted using the R 3.3.2 statistical software (R Core Team, 2015). The linear mixed-  
267 effects models (LMMs) were fitted with a Gaussian error distribution using the ‘lmer’  
268 function of the lme4 package (Bates, Mächler, Bolker, & Walker, 2015). Response data  
269 were transformed by taking the natural logarithm of each value when needed to meet the  
270 assumptions of normality and homogeneity of variance.

271

## 272 **Results**

273 *Effects of abiotic and biotic drivers on soil respiration responses to temperature*

274 First, we found a consistent and positive significant effect of assay temperature on soil  
275 respiration both within and across chronosequences ( $P < 0.001$  in all cases, Figure 1 and  
276 2, Table S1 and S2, respectively). The magnitude of this positive effect varied between  
277 chronosequences (Figure 3). For instance, the assay temperature effect in a Mediterranean  
278 sedimentary chronosequence from California (CAL) was 84.5% (95% CI= 51.07%-  
279 117.96%) and 144.44% (95% CI = 94.63% - 146.63%) greater than in a Mediterranean  
280 sandy chronosequence in Western Australia (WA) or a volcanic forest chronosequence  
281 from Hawaii (HA), respectively (Figure 3).

282 The effect of assay temperature on soil respiration was consistently positive across  
283 all the climatic conditions and soil properties evaluated (Figure 4). However,  
284 environmental variables altered the magnitude of the assay temperature effect on soil  
285 respiration. For instance, the effect of assay temperature was 12.08% (95% CI = 5.40% -  
286 18.77%) lower for the volcanic chronosequences compared with the ones with a  
287 sedimentary or a dune origin (Figure 4). However, the greatest differences on the  
288 magnitude of such effect were observed in sites with contrasting soil texture (Figure 4).  
289 Specifically, soils with  $> 20\%$  silt and clay showed a 43.65% (95% CI = 35.18% -  
290 52.12%) higher effect of assay temperature on soil respiration compared with soils with  
291  $< 20\%$  silt and clay. On the other hand, the effect of assay temperature on soil respiration  
292 was 23% (95% CI = 15% - 30%) greater in sites with higher SOC, microbial biomass,  
293 and soil P content compared with soils with lower values of such soil properties (Figure  
294 4). The magnitude of the assay temperature effect slight differed (i.e., 9% difference; 95%  
295 CI = 5% - 17%) between soils with contrasting pH values (Figure 4). On the other hand,  
296 the magnitude of the assay temperature effect on soil respiration did not change across  
297 soils with contrasting MAT values (Figure 4).

298

299 *Effect of soil development on soil respiration and its response to temperature*

300 When analysing the effect of soil development on soil respiration at every  
301 chronosequence separately, we did not observe any significant effect in five out of eight  
302 chronosequences (Figure 1, Table S1). We found higher soil respiration rates in older  
303 soils than in younger ones in three volcanic chronosequences located in temperate and  
304 tropical forests in Chile (i.e., CH,  $P = 0.016$ , Figure 1, Table S1), Spain (i.e., CI,  $P =$   
305  $0.049$ , Figure 1, Table S1) and Hawaii (i.e., HA,  $P = 0.009$ , Figure 1, Table S1). We also  
306 observed a positive effect of soil development on respiration across chronosequences ( $P$   
307  $= 0.004$ , Figure 2, Table S2). Regardless these results, soil development did not affect  
308 respiration responses to temperature neither within nor across chronosequences, as the  
309 interaction between soil development and assay temperature was not significant ( $P > 0.05$   
310 in all cases).

311

312 *Thermal acclimation of soil respiration to ambient temperature regimes*

313 The site MAT did not affect soil respiration ( $P = 0.487$ , Table S2) nor its response to  
314 assay temperature (MAT  $\times$  assay temperature,  $P = 0.807$ ), suggesting the absence of  
315 acclimation of soil respiration to the ambient temperature regime. The lack of MAT effect  
316 on soil respiration was constant across all soil development stages (MAT  $\times$  soil  
317 development,  $P = 0.122$ ).

318

319

320 **Table 1. Climate origin, vegetation type, age, and environmental conditions for**  
 321 **eight soil chronosequences.** Chronosequence origin describes the major causal agent of  
 322 each chronosequence. Climate and vegetation types show the main climatic conditions  
 323 and the dominant vegetation for each chronosequence. MAT= Mean annual  
 324 temperature, MAP= Mean annual precipitation, SOC= Soil organic carbon, Soil P= Soil  
 325 phosphorus, and Microbial biomass= Sum of all bacterial, fungi, and other soil  
 326 microbial biomarkers.

| Chronosequences                        |            |             |             |            |             |            |                   |                |
|----------------------------------------|------------|-------------|-------------|------------|-------------|------------|-------------------|----------------|
| Label                                  | AZ         | CAL         | CH          | CI         | CO          | HA         | JOR               | WA             |
| Country                                | USA        | USA         | Chile       | Spain      | USA         | USA        | USA               | Australia      |
| Name                                   | SAGA       | Merced      | Conguillio  | La Palma   | Coal Creek  | Hawaii     | Jornada<br>Desert | Jurien Bay     |
| Age                                    | 0.9-3000ky | 0.1-3000ky  | 0.06-5000ky | 0.5-1700ky | 5-2000ky    | 0.3-4100ky | 1.1-25ky          | 0.1-<br>2000ky |
| Chronosequence<br>origin               | Volcanic   | Sedimentary | Volcanic    | Volcanic   | Sedimentary | Volcanic   | Sedimentary       | Sand<br>dunes  |
| Climate                                | Arid       | Temperate   | Temperate   | Temperate  | Continental | Tropical   | Arid              | Temperate      |
| Vegetation type                        | Forests    | Grasslands  | Forests     | Forests    | Grasslands  | Forests    | Forblands         | Shrublands     |
| MAT (°C)                               | 10.4±1.4   | 16.3±0.3    | 8.7±0.8     | 13.8±1.6   | 9.3±0.5     | 15.9±0.5   | 15.43±0.0         | 19.6±0.1       |
| MAP (mm)                               | 421±57     | 378±64      | 1907±16     | 451±34     | 482±7       | 1895±380   | 276±4             | 558±4          |
| SOC (%)                                | 2.6±1.9    | 4.9±2.9     | 3.8±3.5     | 5.1±5.5    | 3.7±1.0     | 25.3±12.5  | 0.6±0.2           | 1.2±0.6        |
| Texture (%<br>clay+silt)               | 40.4±28.1  | 44.1±17     | 8.3±2.6     | 23.1±11.7  | 34.6±3.3    | 14.3±3.8   | 18.9±3.5          | 3.8±1.4        |
| pH                                     | 7.2±0.3    | 6±0.8       | 5.8±0.4     | 6.7±0.4    | 6±0.3       | 4.2±0.6    | 8.1±0.4           | 7.3±1.2        |
| Soil P (%)                             | 0.09±0.02  | 0.06±0.03   | 0.02±0.01   | 0.20±0.05  | 0.06±0.01   | 0.07±0.03  | 0.05±0.01         | 0.02±0.02      |
| Microbial biomass<br>(nmolPLFA/g soil) | 356±371    | 1733±886    | 1293±1752   | 622±738    | 667±289     | 5991±1784  | 126±52            | 112±63         |

327

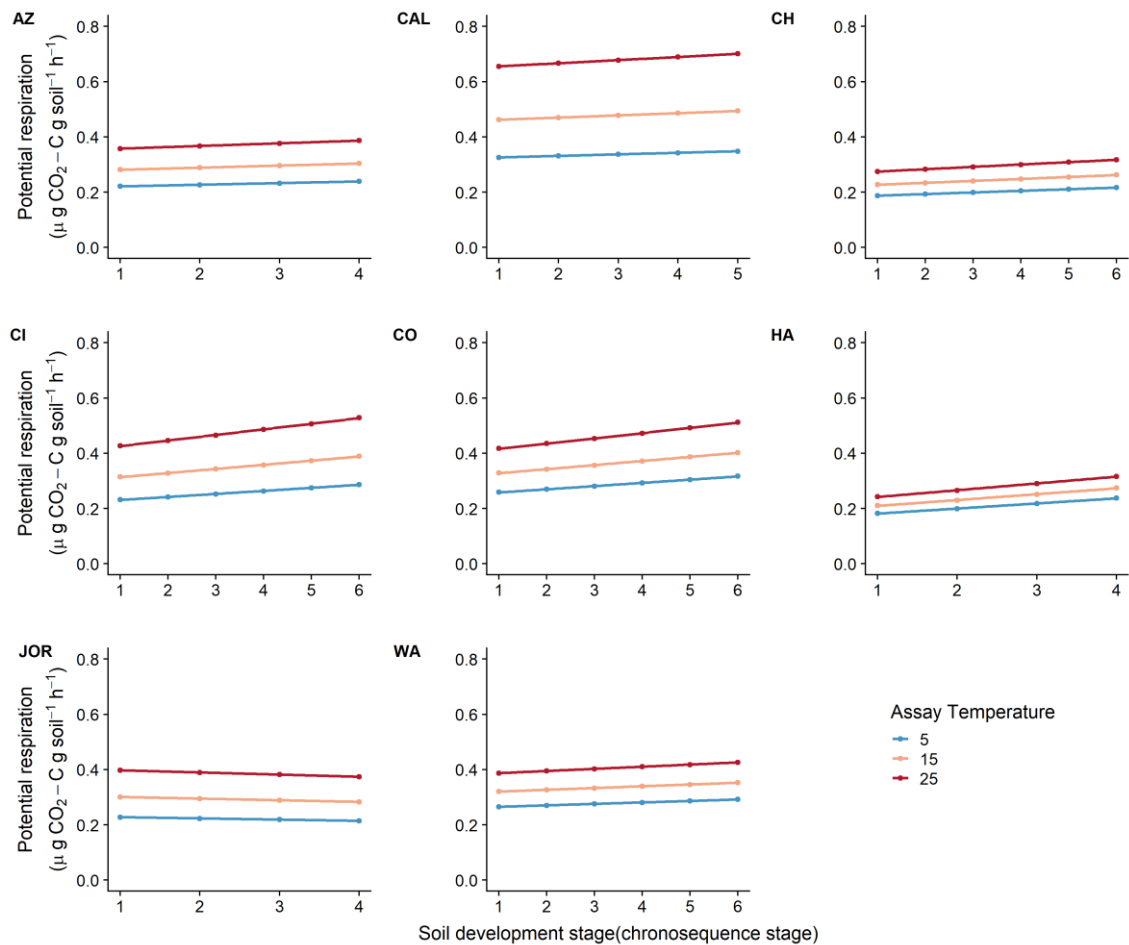

328

329 **Figure 1.** Estimated effects of assay temperature and soil development stage  
330 (chronosequence stage) on potential respiration rates at a controlled biomass value and  
331 with substrate in excess within chronosequence. The effects were estimated using  
332 coefficients from the linear model used for each chronosequence (Table S1). Three  
333 outcomes of this model are shown, one for each temperature assayed (i.e. 5, 15, and 25°C).  
334 Specifically, we estimated soil respiration rates using the unstandardized coefficients of  
335 the model, along with the mean value of the soil properties included in the model of each  
336 chronosequence, one of the assay temperatures and one of the soil development stages  
337 observed in each chronosequence.

338

339

340

341

342

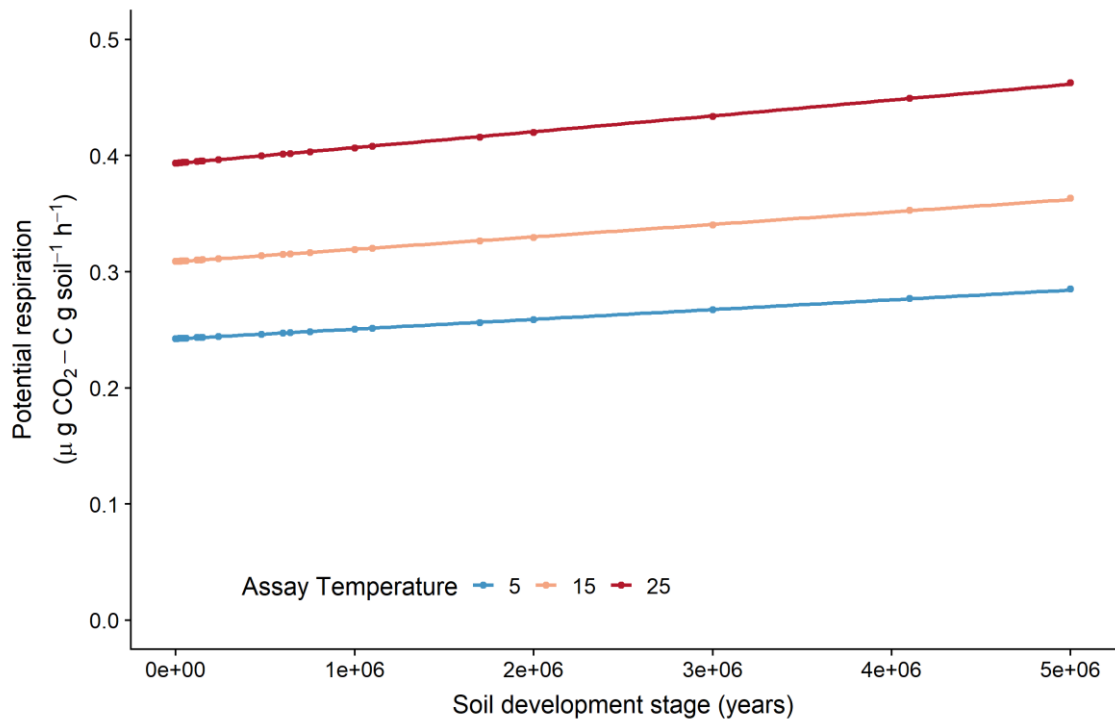

343

344 **Figure 2.** Estimated effects of assay temperature and soil development stage (years) on  
345 potential respiration rates at a controlled biomass value and with substrate in excess across  
346 chronosequences. The effects were estimated using coefficients from the linear mixed-  
347 effects model (Table S2). Three outcomes of this model are shown, one for each  
348 temperature assayed (i.e. 5, 15, and 25°C). Specifically, we estimated soil respiration rates  
349 using the unstandardized coefficients of the model, along with the mean value of the soil  
350 properties included in the model of each chronosequence, one of the assay temperatures  
351 and one of the soil development stages observed across all sites.

352

353

354



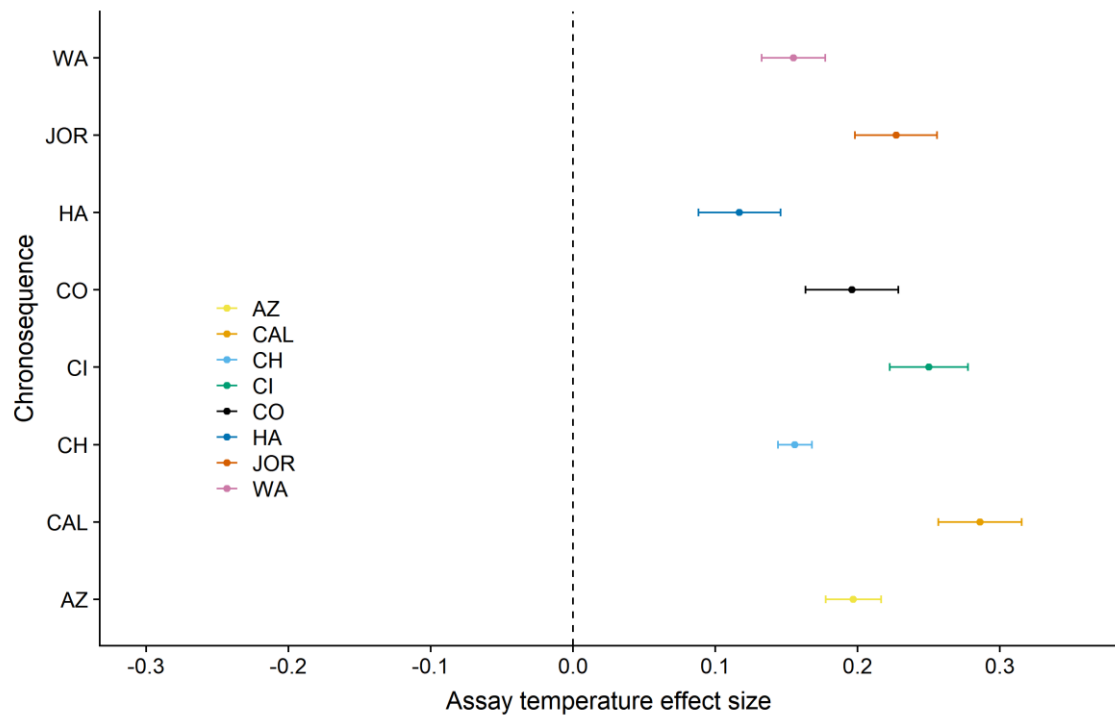

355

356 **Figure 3.** Comparison on the magnitude of the effects of assay temperature on soil  
357 respiration among the eight chronosequences studied. The points represent the mean and  
358 the error bars correspond to the 95% CI. AZ, JOR, HA presented four stages (n=4), CAL  
359 had five stages (n=5) and the rest showed six stages (n= 6).

360

361

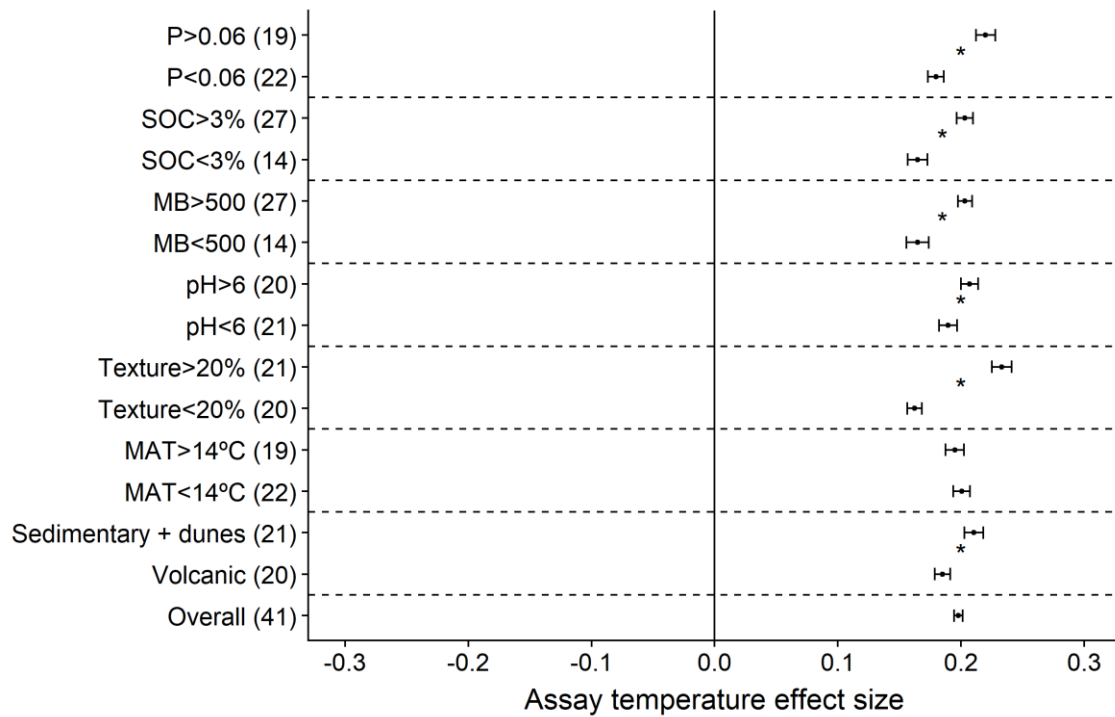

362

363 **Figure 4.** Comparison of the effects of assay temperature on soil respiration among  
 364 different environmental conditions. The points represent the mean and the error bars  
 365 correspond to the 95% CI. Asterisks denote significant differences at  $p < 0.05$ . The total  
 366 n was shown in brackets and it was the result of the number of stages within the  
 367 chronosequences x the number of chronosequences included in each level of the  
 368 classification. MAT= mean annual temperature, Texture=% of clay + silt, MB= total  
 369 microbial biomass, SOC= soil organic carbon, and P= soil phosphorus. Volcanic and  
 370 sedimentary + dunes refer to the different origins observed across the eight  
 371 chronosequences studied.

372

373

374

375

376

## 377 **Discussion**

378 Our study shows that elevated temperatures consistently increased soil heterotrophic  
379 respiration rates across contrasting soil chronosequences. Although older soils tended to  
380 support higher soil respiration—especially in volcanic, temperate, and tropical forests—,  
381 our findings indicate that soil development did not alter the relationship between  
382 heterotrophic respiration and temperature. Conversely, soil properties such as SOC, the  
383 amount of clay and silt, pH, microbial biomass, and P content had a significant control  
384 on the magnitude of positive temperature effects on soil respiration. Overall, these  
385 findings provide new insights into the role of soil properties in driving soil respiration  
386 responses to temperature, which are essential to project the magnitude of the land C-  
387 climate feedback accurately.

388

389 We observed a consistent positive effect of assay temperature on soil respiration  
390 within and across chronosequences. Such results agree with previous literature addressing  
391 the effects of temperature on soil organic matter decomposition and soil respiration rates  
392 (Davidson & Janssens, 2006; Kirschbaum, 2006; Lloyd & Taylor, 1994; Min et al., 2020).  
393 The enhancing effect of temperature on soil respiration is largely driven by the  
394 acceleration of microbial metabolic rates (Hochachka & Somero, 2002). Importantly, the  
395 effect of elevated temperatures on soil respiration was positive in all chronosequences  
396 studied, suggesting that this enhancing effect, at least in our study, is independent of the  
397 ecosystem type. However, certain chronosequences showed differences in the magnitude  
398 of the assay temperature effect between them. That could be explained by our results  
399 indicating that environmental conditions and soil biotic and abiotic properties have the  
400 ability to determine the magnitude of the consistently positive effect of temperature on  
401 soil respiration. For instance, soil respiration responses to assay temperature differed

402 depending on the origin of the chronosequence considered. Such results suggest that  
403 parent material also influences soil respiration responses to temperature. An explanation  
404 for these observed differences could be that soil develops differently according to several  
405 factors such as soil parent material (Alfaro et al., 2017; Carlson, Flagstad, Gillet, &  
406 Mitchell, 2010; Jenny, 1941). Moreover, we found that the magnitude of the effect of  
407 assay temperature was lower in sites with less soil P available. Such results indicate that  
408 this nutrient is necessary to sustain microbial activity (Liu, Gundersen, Zhang, & Mo,  
409 2012). Further, we also observed differences in the magnitude of the response of soil  
410 respiration to elevated temperatures between sites with contrasting amounts of clay and  
411 silt. These differences could be caused by the fact that water availability in the soil is  
412 expected to increase when the amount of clay and silt in the soil rises (Delgado-Baquerizo  
413 et al., 2013), accelerating microbial activity (Karhu et al., 2014; Luo, Wan, Hui, &  
414 Wallace, 2001). However, this effect of the amount of clay and silt on soil respiration  
415 responses to temperature could disappear at high amounts of clay and silt, as clay and silt  
416 may limit microbial access to SOC. Also, the magnitude of the effect of assay  
417 temperature on soil respiration increased in sites with greater soil pH, as the microbial  
418 activity is negatively affected by acidification (Reth, Reichstein, & Falge, 2005; Rustad  
419 et al., 2000). Finally, our results indicated that soil respiration response to assay  
420 temperature increases with substrate availability (i.e., SOC) and microbial biomass. This  
421 increase in soil respiration rates in response to temperature under high SOC and microbial  
422 biomass conditions may cause the acceleration of microbial activity and, subsequently, a  
423 substrate depletion and an important reduction of microbial biomass (Cavicchioli et al.,  
424 2019). Thus, our findings provide new insights about how soil properties modulate the  
425 magnitude of the consistently enhancing effect of temperature on soil respiration.

426

427           In three out of the eight chronosequences evaluated, we found a significant  
428 positive effect of soil development on soil respiration rates. Interestingly, all these  
429 chronosequences shared a volcanic origin. The different effect of soil development on  
430 soil respiration found across chronosequences may be mediated by contrasting parent  
431 material between them, leading to variations in the soil development trajectories followed  
432 by the eight chronosequences evaluated. The differences in the range of years covered by  
433 each of the chronosequences evaluated may also influence the effect of soil development  
434 on soil respiration. Such contrasting results observed when analysing each  
435 chronosequence separately limits our capacity to draw more general conclusions about  
436 how soil C losses to the atmosphere via soil respiration change over soil development,  
437 specially under a warming scenario. Such limitations are similar to the ones found in  
438 previous studies (J. L. Campbell & Law, 2005; Law et al., 2003; Saiz et al., 2006; Tang  
439 et al., 2008; Wang et al., 2002) conducted on a single chronosequence and covering a  
440 narrow range of soil development stages (from years to centuries). Therefore, when  
441 evaluating soil development effect on soil respiration across chronosequences, we  
442 observed a significant enhancing effect of soil development stage on soil respiration. Our  
443 findings improve our knowledge about the effect of soil development stage on soil  
444 respiration across large spatial scales including different ecosystem types with contrasting  
445 environmental conditions and soil properties. Specifically, our results indicated that elder  
446 soils have greater soil C losses to the atmosphere than younger ones. Such greater soil  
447 respiration rates found in elder soils within some and across chronosequences may be  
448 explained by the increase in soil C easily releasable from mineral-SOC associations in  
449 soils that had experienced higher weathering (Keiluweit et al., 2015). Conversely, we  
450 observed that soil development did not modulate the magnitude of the effect of assay  
451 temperature on soil respiration, as the interaction between soil development stage and

452 assay temperature was not significant either within or across chronosequences. These  
453 results indicate that, no matter how old soils are, soil carbon stocks are highly sensitive  
454 to increases in temperature associated with climate change. Thus, although worldwide  
455 soils show contrasting ages (Laliberté et al., 2013; Wardle, Bardgett, Walker, Peltzer, &  
456 Lagerström, 2008), they present similar soil respiration responses to temperature. Further,  
457 the assay temperature effect was at least three times larger in magnitude than the effect  
458 of soil development stage on soil respiration. Such results agree with previous studies  
459 showing pronounced soil respiration responses to assay temperature (Bradford et al.,  
460 2010), especially across large temperature ranges such as those used in our incubations  
461 (i.e. from 5 to 25°C). Consequently, our study supports that soil microbial communities  
462 from very different ecosystem types are capable of rapidly responding to increasing  
463 temperature, resulting in greater soil respiration.

464

465 A growing body of evidence suggests that thermal acclimation of soil microbial  
466 respiration to temperature can be found across large spatial scales (Bradford et al., 2019,  
467 2010; Dacal et al., 2019; Ye, Bradford, Maestre, Li, & García-Palacios, 2020). However,  
468 we did not find a significant effect of MAT, suggesting that soil respiration is not  
469 acclimated to the ambient temperature regime at our sites. This apparent disagreement  
470 may be due to the shorter MAT gradient evaluated in our study (i.e., from 8.7°C to  
471 19.55°C) compared with previous ones (i.e., from -2 to 28°C; Bradford et al., 2019; Dacal  
472 et al., 2019; Ye, Bradford, Maestre, Li, & García-Palacios, 2020). Nevertheless, our  
473 results are similar to other cross-biome studies (Carey et al., 2016; Karhu et al., 2014),  
474 and may be the result of negligible effects of thermal acclimation on soil respiration when  
475 compared with overarching factors such as assay temperature (Hochachka & Somero,  
476 2002).

477 In conclusion, we found that assay temperature consistently enhanced soil  
478 respiration across contrasting chronosequences. On the other hand, we observed no  
479 evidence of thermal acclimation of soil respiration to the ambient temperature regime.  
480 Although we observed a positive effect of soil development on soil respiration, it did not  
481 change the magnitude of the assay temperature effect. Despite the clear and positive effect  
482 of assay temperature on soil respiration observed, soil properties such as SOC, texture,  
483 pH, P content, and microbial biomass significantly modified the magnitude of this  
484 positive soil respiration response to temperature. Our findings emphasize the role of biotic  
485 and biotic soil properties as drivers of soil respiration responses to temperature across  
486 biomes and provide new insights to better understand the magnitude of the land C-Climate  
487 feedback and to establish accurate greenhouse emission targets.

488

#### 489 **Acknowledgements**

490 This project received funding from the European Union's Horizon 2020 research and  
491 innovation program under Marie Skłodowska-Curie Grant Agreement 702057. M.D. was  
492 supported by an FPU fellowship from the Spanish Ministry of Education, Culture and  
493 Sports (FPU-15/00392). M.D. and F.T.M. are supported by the European Research  
494 Council (Consolidator Grant Agreement No 647038, BIODESERT). M.D-B. is supported  
495 by a Large Research Grant from the British Ecological Society (grant agreement n°  
496 LRA17\1193, MUSGONET). F.T.M and M.D-B. acknowledge support from the Spanish  
497 Ministry (project CGL2017-88124-R). PGP and M.D-B. are supported by a Ramón y  
498 Cajal grant from the Spanish Ministry of Science and Innovation (RYC2018-024766-I  
499 and RYC2018-025483-I, respectively). F.T.M. acknowledges support from the  
500 Generalitat Valenciana (CIDEGENT/2018/041). We would like to thank Matt Gebert,  
501 Jessica Henley, Victoria Ochoa, and Beatriz Gozalo for their help with lab analyses. We

502 also want to thank Lynn Riedel, Julie Larson, Katy Waechter and Drs. David Buckner  
503 and Brian Anacker for their help with soil sampling in the chronosequence from  
504 Colorado, and to the City of Boulder Open Space and Mountain Parks for allowing us to  
505 conduct these collections.

506

### 507 **Authorship**

508 M.D., M.D.-B. and P.G.P developed the original idea of the analyses presented in the  
509 manuscript. M.D.-B. designed the field study and wrote the grant that funded the work.  
510 J.B. conducted the laboratory work with inputs from M.D.-B and A.G. M.D. performed  
511 the statistical analyses, with inputs from M.D.-B., F.T.M and P.G.P. All authors included  
512 A.A.B. contributed to data interpretation. M.D. wrote the first version of the manuscript,  
513 which was revised by all co-authors.

514

### 515 **Competing interests**

516 The authors declare no competing financial interests.

517

### 518 **References**

- 519 Alfaro, F. D., Manzano, M., Marquet, P. A., & Gaxiola, A. (2017). Microbial  
520 communities in soil chronosequences with distinct parent material: the effect of  
521 soil pH and litter quality. *Journal of Ecology*, *105*(6), 1709–1722.  
522 <https://doi.org/10.1111/1365-2745.12766>
- 523 Anderson, J. M., & Ingram, J. S. I. (1993). *Tropical soil biology and fertility: A*  
524 *handbook of methods*. Oxford: CAB International.
- 525 Arora, V. K., Boer, G. J., Friedlingstein, P., Eby, M., Jones, C. D., Christian, J. R., ...  
526 Wu, T. (2013). Carbon-concentration and carbon-climate feedbacks in CMIP5



- 527 earth system models. *Journal of Climate*, 26(15), 5289–5314.
- 528 <https://doi.org/10.1175/JCLI-D-12-00494.1>
- 529 Atkin, O. K., & Tjoelker, M. G. (2003). Thermal acclimation and the dynamic response  
530 of plant respiration to temperature. *Trends in Plant Science*, 8(7), 343–351.
- 531 [https://doi.org/10.1016/S1360-1385\(03\)00136-5](https://doi.org/10.1016/S1360-1385(03)00136-5)
- 532 Bates, D., Mächler, M., Bolker, B. M., & Walker, S. C. (2015). Fitting linear mixed-  
533 effects models using lme4. *Journal of Statistical Software*, 67(1), 1–48.
- 534 <https://doi.org/10.18637/jss.v067.i01>
- 535 Bligh, E. G., & Dyer, W. J. (1959). A rapid method of total extraction and purification.  
536 *Canadian Journal of Biochemistry and Physiology*, 37(8), 911–917.
- 537 Bond-Lamberty, B., Bailey, V. L., Chen, M., Gough, C. M., & Vargas, R. (2018).  
538 Globally rising soil heterotrophic respiration over recent decades. *Nature*,  
539 560(7716), 80–83. <https://doi.org/10.1038/s41586-018-0358-x>
- 540 Bond-Lamberty, B., & Thomson, A. (2010). Temperature-associated increases in the  
541 global soil respiration record. *Nature*, 464(7288), 579–582.
- 542 <https://doi.org/10.1038/nature08930>
- 543 Bradford, M. A., Ciska, G. F., Bonis, A., Bradford, E. M., Classen, A. T., Cornelissen,  
544 J. H. C., ... Van Der Putten, W. H. (2017). A test of the hierarchical model of litter  
545 decomposition. *Nature Ecology and Evolution*, 1(12), 1836–1845.
- 546 <https://doi.org/10.1038/s41559-017-0367-4>
- 547 Bradford, M. A., Davies, C. A., Frey, S. D., Maddox, T. R., Melillo, J. M., Mohan, J. E.,  
548 ... Wallenstein, M. D. (2008). Thermal adaptation of soil microbial respiration to  
549 elevated temperature. *Ecology Letters*, 11(12), 1316–1327.
- 550 <https://doi.org/10.1111/j.1461-0248.2008.01251.x>
- 551 Bradford, M. A., McCulley, R. L., Crowther, T. W., Oldfield, E. E., Wood, S. A., &

- 552 Fierer, N. (2019). Cross-biome patterns in soil microbial respiration predictable  
553 from evolutionary theory on thermal adaptation. *Nature Ecology & Evolution*, *3*(2),  
554 223–231. <https://doi.org/10.1038/s41559-018-0771-4>
- 555 Bradford, M. A., Watts, B. W., & Davies, C. A. (2010). Thermal adaptation of  
556 heterotrophic soil respiration in laboratory microcosms. *Global Change Biology*,  
557 *16*(5), 1576–1588. <https://doi.org/10.1111/j.1365-2486.2009.02040.x>
- 558 Bradford, M. A., Wieder, W. R., Bonan, G. B., Fierer, N., Raymond, P. A., & Crowther,  
559 T. W. (2016). Managing uncertainty in soil carbon feedbacks to climate change.  
560 *Nature Climate Change*, *6*(8), 751–758. <https://doi.org/10.1038/nclimate3071>
- 561 Buyer, J. S., & Sasser, M. (2012). High throughput phospholipid fatty acid analysis of  
562 soils. *Applied Soil Ecology*, *61*, 127–130.
- 563 Campbell, C. D., Chapman, S. J., Cameron, C. M., Davidson, M. S., & Potts, J. M.  
564 (2003). A rapid microtiter plate method to measure carbon dioxide evolved from  
565 carbon substrate amendments so as to determine the physiological profiles of soil  
566 microbial communities by using whole soil. *Applied and Environmental*  
567 *Microbiology*, *69*(6), 3593–3599. [https://doi.org/10.1128/AEM.69.6.3593-](https://doi.org/10.1128/AEM.69.6.3593-3599.2003)  
568 [3599.2003](https://doi.org/10.1128/AEM.69.6.3593-3599.2003)
- 569 Campbell, J. L., & Law, B. E. (2005). Forest soil respiration across three climatically  
570 distinct chronosequences in Oregon. *Biogeochemistry*, *73*(1), 109–125.  
571 <https://doi.org/10.1007/s10533-004-5165-9>
- 572 Carey, J. C., Tang, J., Templer, P. H., Kroeger, K. D., Crowther, T. W., Burton, A. J.,  
573 ... Tietema, A. (2016). Temperature response of soil respiration largely unaltered  
574 with experimental warming. *Proceedings of the National Academy of Sciences*,  
575 *113*(48), 13797–13802. <https://doi.org/10.1073/pnas.1605365113>
- 576 Carlson, M. L., Flagstad, L. A., Gillet, F., & Mitchell, E. A. D. (2010). Community

577 development along a proglacial chronosequence: Are above-ground and below-  
578 ground community structure controlled more by biotic than abiotic factors?  
579 *Journal of Ecology*, 98(5), 1084–1095. <https://doi.org/10.1111/j.1365->  
580 [2745.2010.01699.x](https://doi.org/10.1111/j.1365-2745.2010.01699.x)

581 Cavicchioli, R., Ripple, W. J., Timmis, K. N., Azam, F., Bakken, L. R., Baylis, M., ...  
582 Webster, N. S. (2019). Scientists' warning to humanity: microorganisms and  
583 climate change. *Nature Reviews Microbiology*, 17(9), 569–586.  
584 <https://doi.org/10.1038/s41579-019-0222-5>

585 Ciais, P., Sabine, C., Bala, G., Bopp, L., Brovkin, V., Canadell, A., ... Thornton, P.  
586 (2014). Carbon and other biogeochemical cycles. In *Climate Change (2013):The*  
587 *physical science basis. Contribution of working group I to the fifth assessment*  
588 *report of the Intergovernmental Panel on Climate Change* (pp. 465–570).  
589 Cambridge University Press.

590 Crews, T. E., Kitayama, K., Fownes, J. H., Riley, R. H., Herbert, D. A., Mueller-  
591 Dombois, D., & Vitousek, P. M. (1995). Changes in soil phosphorus fractions and  
592 ecosystem dynamics across a long chronosequence in Hawaii. *Ecology*, 76(5),  
593 1407–1424. <https://doi.org/10.2307/1938144>

594 Dacal, M., Bradford, M. A., Plaza, C., Maestre, F. T., & García-Palacios, P. (2019). Soil  
595 microbial respiration adapts to ambient temperature in global drylands. *Nature*  
596 *Ecology & Evolution*, 3(2), 232–238. <https://doi.org/10.1038/s41559-018-0770-5>

597 Davidson, E. A., & Janssens, I. A. (2006). Temperature sensitivity of soil carbon  
598 decomposition and feedbacks to climate change. *Nature*, 440.  
599 <https://doi.org/10.1038/nature04514>

600 Davidson, E. A., Janssens, I. A., & Luo, Y. (2006). On the variability of respiration in  
601 terrestrial ecosystems : moving beyond Q10. *Global Change Biology*, 12, 154–164.

- 602 <https://doi.org/10.1111/j.1365-2486.2005.01065.x>
- 603 Delgado-Baquerizo, M., Bardgett, R. D., Vitousek, P. M., Maestre, F. T., Williams, M.  
604 A., Eldridge, D. J., ... Fierer, N. (2019). Changes in belowground biodiversity  
605 during ecosystem development. *Proceedings of the National Academy of Sciences*  
606 *of the United States of America*, *116*(14), 6891–6896.  
607 <https://doi.org/10.1073/pnas.1818400116>
- 608 Delgado-Baquerizo, M., Maestre, F. T., Gallardo, A., Bowker, M. A., Wallenstein, M.  
609 D., Quero, J. L., ... Zaady, E. (2013). Decoupling of soil nutrient cycles as a  
610 function of aridity in global drylands. *Nature*, *502*(7473), 672–676.  
611 <https://doi.org/10.1038/nature12670>
- 612 Delgado-Baquerizo, M., Reich, P. B., Bardgett, R. D., Eldridge, D. J., Lambers, H.,  
613 Wardle, D. A., ... Fierer, N. (2020). The influence of soil age on ecosystem  
614 structure and function across biomes. *Nature Communications*, *11*(1), 1–14.  
615 <https://doi.org/10.1038/s41467-020-18451-3>
- 616 Doetterl, S., Berhe, A. A., Arnold, C., Bodé, S., Fiener, P., Finke, P., ... Boeckx, P.  
617 (2018). Links among warming, carbon and microbial dynamics mediated by soil  
618 mineral weathering. *Nature Geoscience*, *11*(8), 589–593.  
619 <https://doi.org/10.1038/s41561-018-0168-7>
- 620 Exbrayat, J. F., Pitman, A. J., & Abramowitz, G. (2014). Response of microbial  
621 decomposition to spin-up explains CMIP5 soil carbon range until 2100.  
622 *Geoscientific Model Development*, *7*(6), 2683–2692. [https://doi.org/10.5194/gmd-](https://doi.org/10.5194/gmd-7-2683-2014)  
623 [7-2683-2014](https://doi.org/10.5194/gmd-7-2683-2014)
- 624 Fick, S. E., & Hijmans, R. J. (2017). WorldClim 2: new 1-km spatial resolution climate  
625 surfaces for global land areas. *International Journal of Climatology*, *37*(12), 4302–  
626 4315. <https://doi.org/10.1002/joc.5086>

- 627 Frostegård, A., & Bååth, E. (1996). The use of phospholipid fatty acid analysis to  
628 estimate bacterial and fungal biomass in soil. *Biology and Fertility of Soils*, 22(1–  
629 2), 59–65. <https://doi.org/10.1007/s003740050076>
- 630 Guo, H., Ye, C., Zhang, H., Pan, S., Ji, Y., Li, Z., ... Hu, S. (2017). Long-term nitrogen  
631 & phosphorus additions reduce soil microbial respiration but increase its  
632 temperature sensitivity in a Tibetan alpine meadow. *Soil Biology and  
633 Biochemistry*, 113, 26–34. <https://doi.org/10.1016/j.soilbio.2017.05.024>
- 634 Hartley, I. P., Hopkins, D. W., Garnett, M. H., Sommerkorn, M., & Wookey, P. A.  
635 (2008). Soil microbial respiration in arctic soil does not acclimate to temperature.  
636 *Ecology Letters*, 11(10), 1092–1100. [https://doi.org/10.1111/j.1461-  
637 0248.2008.01223.x](https://doi.org/10.1111/j.1461-0248.2008.01223.x)
- 638 Hochachka, P. W., & Somero, G. N. (2002). *Biochemical adaptation: mechanism and  
639 process in physiological evolution*. New York: Oxford University Press.
- 640 Jenny, H. (1941). *Factors of soil formation: a system of quantitative pedology*.  
641 *Geographical Review*. McGraw-Hill. <https://doi.org/10.2307/211491>
- 642 Karhu, K., Auffret, M. D., Dungait, J. A., Hopkins, D. W., Prosser, J. I., Singh, B. K.,  
643 ... Hartley, I. P. (2014). Temperature sensitivity of soil respiration rates enhanced  
644 by microbial community response. *Nature*, 513(7516), 81–84.  
645 <https://doi.org/10.1038/nature13604>
- 646 Keiluweit, M., Bougoure, J. J., Nico, P. S., Pett-Ridge, J., Weber, P. K., & Kleber, M.  
647 (2015). Mineral protection of soil carbon counteracted by root exudates. *Nature  
648 Climate Change*, 5(6), 588–595. <https://doi.org/10.1038/nclimate2580>
- 649 Kettler, T. A., Doran, J. W., & Gilbert, T. L. (2001). Simplified method for soil particle-  
650 size determination to accompany soil-quality analyses. *Soil Science Society of  
651 America Journal*, 65, 849–852.

- 652 Kirschbaum, M. U. F. (2006). The temperature dependence of organic-matter  
653 decomposition — still a topic of debate. *Soil Biology and Biochemistry*, 38, 2510–  
654 2518. <https://doi.org/10.1016/j.soilbio.2006.01.030>
- 655 Laliberté, E., Grace, J. B., Huston, M. A., Lambers, H., Teste, F. P., Turner, B. L., &  
656 Wardle, D. A. (2013). How does pedogenesis drive plant diversity? *Trends in*  
657 *Ecology and Evolution*, 28(6), 331–340. <https://doi.org/10.1016/j.tree.2013.02.008>
- 658 Law, B. E., Sun, O. J., Campbell, J., Van Tuyl, S., & Thornton, P. E. (2003). Changes in  
659 carbon storage and fluxes in a chronosequence of ponderosa pine. *Global Change*  
660 *Biology*, 9(4), 510–524. <https://doi.org/10.1046/j.1365-2486.2003.00624.x>
- 661 Liu, L., Gundersen, P., Zhang, T., & Mo, J. (2012). Effects of phosphorus addition on  
662 soil microbial biomass and community composition in three forest types in tropical  
663 China. *Soil Biology and Biochemistry*, 44(1), 31–38.  
664 <https://doi.org/10.1016/j.soilbio.2011.08.017>
- 665 Lloyd, J., & Taylor, J. A. (1994). On the temperature dependence of soil respiration.  
666 *Functional Ecology*, 8(3), 315–323.
- 667 Luo, Y., Wan, S., Hui, D., & Wallace, L. L. (2001). Acclimatization of soil respiration  
668 to warming in a tall grass prairie. *Nature*, 413(October), 622–625.  
669 <https://doi.org/10.1038/35098065>
- 670 Min, K., Berhe, A. A., Khoi, C. M., van Asperen, H., Gillabel, J., & Six, J. (2020).  
671 Differential effects of wetting and drying on soil CO<sub>2</sub> concentration and flux in  
672 near-surface vs. deep soil layers. *Biogeochemistry*, 148(3), 255–269.  
673 <https://doi.org/10.1007/s10533-020-00658-7>
- 674 Olsen, S. R., Cole, C. V., Watanabe, F. S., & Dean, L. A. (1954). Estimation of  
675 available phosphorus in soils by extraction with sodium bicarbonate. *USDA*  
676 *Circular 939. U.S. Government Printing Office.*

- 677 Orwin, K. H., Wardle, D. A., Greenfield, L. G., Setälä, H., Orwin, K. H., Wardle, D. A.,  
678 & Greenfield, L. G. (2006). Context-dependent changes in the resistance and  
679 resilience of soil microbes to an experimental disturbance for three primary plant  
680 chronosequences. *Oikos*, *112*(1), 196–208.
- 681 R Core Team. (2015). R: A language and environment for statistical computing.  
682 Vienna, Austria: R Foundation for Statistical Computing. Retrieved from  
683 <http://www.r-project.org/>
- 684 Rasmussen, C., Heckman, K., Wieder, W. R., Keiluweit, M., Lawrence, C. R., Berhe,  
685 A. A., ... Wagai, R. (2018). Beyond clay: towards an improved set of variables for  
686 predicting soil organic matter content. *Biogeochemistry*, *137*(3), 297–306.  
687 <https://doi.org/10.1007/s10533-018-0424-3>
- 688 Reth, S., Reichstein, M., & Falge, E. (2005). The effect of soil water content, soil  
689 temperature, soil pH-value and the root mass on soil CO<sub>2</sub> efflux - A modified  
690 model. *Plant and Soil*, *268*(1), 21–33. <https://doi.org/10.1007/s11104-005-0175-5>
- 691 Rinnan, R., & Bååth, E. (2009). Differential utilization of carbon substrates by bacteria  
692 and fungi in tundra soil. *Applied and Environmental Microbiology*, *75*(11), 3611–  
693 3620. <https://doi.org/10.1128/AEM.02865-08>
- 694 Rustad, L., Huntington, T., & Boone, R. (2000). Controls on soil respiration:  
695 implications for climate change. *Biogeochemistry*, *48*, 1–6.  
696 <https://doi.org/10.1023/A:1006255431298>
- 697 Saiz, G., Byrne, K. A., Butterbach-Bahl, K., Kiese, R., Blujdea, V., & Farrell, E. P.  
698 (2006). Stand age-related effects on soil respiration in a first rotation Sitka spruce  
699 chronosequence in central Ireland. *Global Change Biology*, *12*(6), 1007–1020.  
700 <https://doi.org/10.1111/j.1365-2486.2006.01145.x>
- 701 Schindlbacher, A., Schnecker, J., Takriti, M., Borken, W., & Wanek, W. (2015).

- 702 Microbial physiology and soil CO<sub>2</sub> efflux after 9 years of soil warming in a  
703 temperate forest - no indications for thermal adaptations. *Global Change Biology*,  
704 21(11), 4265–4277. <https://doi.org/10.1111/gcb.12996>
- 705 Schlesinger, W. H. (1990). Evidence from chronosequence studies for a low carbon-  
706 storage potential of soils. *Nature*. <https://doi.org/10.1038/348232a0>
- 707 Tang, J., Bolstad, P. V., Desai, A. R., Martin, J. G., Cook, B. D., Davis, K. J., & Carey,  
708 E. V. (2008). Ecosystem respiration and its components in an old-growth northern  
709 forest. *Agricultural and Forest Meteorology*, 148, 171–185.
- 710 Tarlera, S., Jangid, K., Ivester, A. H., Whitman, W. B., & Williams, M. A. (2008).  
711 Microbial community succession and bacterial diversity in soils during 77 000  
712 years of ecosystem development. *FEMS Microbiology Ecology*, 64(1), 129–140.  
713 <https://doi.org/10.1111/j.1574-6941.2008.00444.x>
- 714 Tucker, C. L., Bell, J., Pendall, E., & Ogle, K. (2013). Does declining carbon-use  
715 efficiency explain thermal acclimation of soil respiration with warming? *Global*  
716 *Change Biology*, 19(1), 252–263. <https://doi.org/10.1111/gcb.12036>
- 717 Vitousek, P. (2004). *Nutrient Cycling and Limitation: Hawai'i as a Model System*.  
718 Princeton, NJ.: Princeton University Press.
- 719 Walker, T. W. N., Kaiser, C., Strasser, F., Herbold, C. W., Leblans, N. I. W., Wuebken,  
720 D., ... Richter, A. (2018). Microbial temperature sensitivity and biomass change  
721 explain soil carbon loss with warming. *Nature Climate Change*, 8(10), 885–889.  
722 <https://doi.org/10.1038/s41558-018-0259-x>
- 723 Wang, Bond-Lamberty, B. P., & Gower, S. T. (2002). Soil surface CO<sub>2</sub> flux in a boreal  
724 black spruce fire chronosequence. *Journal of Geophysical Research –*  
725 *Atmospheres*, 107, 1–8. <https://doi.org/10.1029/2001jd000861>
- 726 Wang, W. J., Dalal, R. C., Moody, P. W., & Smith, C. J. (2003). Relationships of soil



- 727 respiration to microbial biomass, substrate availability and clay content. *Soil*  
728 *Biology and Biochemistry*, 35(2), 273–284. <https://doi.org/10.1016/S0038->  
729 0717(02)00274-2
- 730 Wardle, D. A., Bardgett, R. D., Klironomos, J. N., Setälä, H., Van Der Putten, W. H., &  
731 Wall, D. H. (2004). Ecological linkages between aboveground and belowground  
732 biota. *Science*, 304(5677), 1629–1633. <https://doi.org/10.1126/science.1094875>
- 733 Wardle, D. A., Bardgett, R. D., Walker, L. R., & Bonner, K. I. (2009). Among- and  
734 within-species variation in plant litter decomposition in contrasting long-term  
735 chronosequences. *Functional Ecology*, 23(2), 442–453.  
736 <https://doi.org/10.1111/j.1365-2435.2008.01513.x>
- 737 Wardle, D. A., Bardgett, R. D., Walker, L. R., Peltzer, D. A., & Lagerström, A. (2008).  
738 The response of plant diversity to ecosystem retrogression: Evidence from  
739 contrasting long-term chronosequences. *Oikos*, 117(1), 93–103.  
740 <https://doi.org/10.1111/j.2007.0030-1299.16130.x>
- 741 Wardle, D. A., Walker, L. R., & Bardgett, R. D. (2004). Ecosystem properties and  
742 forest decline in contrasting long-term chronosequences. *Science*, 305(5683), 509–  
743 513. <https://doi.org/10.1126/science.1098778>
- 744 Ye, J., Bradford, M. A., Maestre, F. T., Li, F., & García-Palacios, P. (2020).  
745 Compensatory thermal adaptation of soil microbial respiration rates in global  
746 croplands. *Global Biogeochemical Cycles*, 34(6), 0–2.  
747 <https://doi.org/10.1029/2019gb006507>
- 748 Zhou, L., Zhou, X., Shao, J., Nie, Y., He, Y., Jiang, L., ... Hosseini Bai, S. (2016).  
749 Interactive effects of global change factors on soil respiration and its components:  
750 a meta-analysis. *Global Change Biology*, 22(9), 3157–3169.  
751 <https://doi.org/10.1111/gcb.13253>
